# Supplementary material
Source: publisher figshare collection journal article supplement (https://sage.figshare.com/ndownloader/files/20178998)
Supplement: Supplementary file 1 [file 20178998]

## Sheet: 6h
Term	ID	Input number	Background number	P-Value	Corrected P-Value	Input	Hyperlink
Biosynthesis of amino acids	mmu01230	5	79	2.02e-08	1.38e-06	21881|21991|11674|18648|21351	http://www.genome.jp/kegg-bin/show_pathway?mmu01230/mmu:21881%09red/mmu:18648%09red/mmu:21351%09red/mmu:11674%09red/mmu:21991%09red
Carbon metabolism	mmu01200	5	118	1.38e-07	4.68e-06	21881|21991|11674|18648|21351	http://www.genome.jp/kegg-bin/show_pathway?mmu01200/mmu:21881%09red/mmu:18648%09red/mmu:21351%09red/mmu:11674%09red/mmu:21991%09red
Pentose phosphate pathway	mmu00030	3	31	5.12e-06	0.00011594	21881|11674|21351	http://www.genome.jp/kegg-bin/show_pathway?mmu00030/mmu:21881%09red/mmu:21351%09red/mmu:11674%09red
Glycolysis / Gluconeogenesis	mmu00010	3	66	4.37e-05	0.000743508	21991|11674|18648	http://www.genome.jp/kegg-bin/show_pathway?mmu00010/mmu:18648%09red/mmu:11674%09red/mmu:21991%09red
Hypertrophic cardiomyopathy (HCM)	mmu05410	3	84	8.74e-05	0.00109572	11421|11464|11461	http://www.genome.jp/kegg-bin/show_pathway?mmu05410/mmu:11461%09red/mmu:11464%09red/mmu:11421%09red
Complement and coagulation cascades	mmu04610	3	87	9.67e-05	0.00109572	317677|74145|21788	http://www.genome.jp/kegg-bin/show_pathway?mmu04610/mmu:317677%09red/mmu:74145%09red/mmu:21788%09red
Fructose and mannose metabolism	mmu00051	2	35	0.000611639	0.00594163	21991|11674	http://www.genome.jp/kegg-bin/show_pathway?mmu00051/mmu:11674%09red/mmu:21991%09red
Focal adhesion	mmu04510	3	203	0.00109251	0.00928631	14257|20750|11461	http://www.genome.jp/kegg-bin/show_pathway?mmu04510/mmu:11461%09red/mmu:20750%09red/mmu:14257%09red
Cytokine-cytokine receptor interaction	mmu04060	3	265	0.00231495	0.0174908	56744|14257|57349	http://www.genome.jp/kegg-bin/show_pathway?mmu04060/mmu:56744%09red/mmu:14257%09red/mmu:57349%09red
Dilated cardiomyopathy	mmu05414	2	90	0.00371585	0.0252678	11464|11461	http://www.genome.jp/kegg-bin/show_pathway?mmu05414/mmu:11461%09red/mmu:11464%09red
PI3K-Akt signaling pathway	mmu04151	3	350	0.00500951	0.0309679	14257|20750|22631	http://www.genome.jp/kegg-bin/show_pathway?mmu04151/mmu:20750%09red/mmu:14257%09red/mmu:22631%09red
Leukocyte transendothelial migration	mmu04670	2	121	0.00653423	0.0370273	17698|11461	http://www.genome.jp/kegg-bin/show_pathway?mmu04670/mmu:11461%09red/mmu:17698%09red
Measles	mmu05162	2	139	0.0085009	0.0388167	17698|15481	http://www.genome.jp/kegg-bin/show_pathway?mmu05162/mmu:17698%09red/mmu:15481%09red
Apoptosis	mmu04210	2	139	0.0085009	0.0388167	11461|13033	http://www.genome.jp/kegg-bin/show_pathway?mmu04210/mmu:11461%09red/mmu:13033%09red
Metabolic pathways	mmu01100	5	1298	0.0085625	0.0388167	21881|21991|11674|18648|21351	http://www.genome.jp/kegg-bin/show_pathway?mmu01100/mmu:21881%09red/mmu:18648%09red/mmu:21351%09red/mmu:11674%09red/mmu:21991%09red
Hippo signaling pathway	mmu04390	2	154	0.0103173	0.0438487	22631|11461	http://www.genome.jp/kegg-bin/show_pathway?mmu04390/mmu:11461%09red/mmu:22631%09red
Influenza A	mmu05164	2	172	0.012703	0.0508119	15481|11461	http://www.genome.jp/kegg-bin/show_pathway?mmu05164/mmu:11461%09red/mmu:15481%09red
Chemokine signaling pathway	mmu04062	2	198	0.0165297	0.0624457	56744|57349	http://www.genome.jp/kegg-bin/show_pathway?mmu04062/mmu:56744%09red/mmu:57349%09red
Proteoglycans in cancer	mmu05205	2	208	0.018117	0.0640057	17698|11461	http://www.genome.jp/kegg-bin/show_pathway?mmu05205/mmu:11461%09red/mmu:17698%09red
Rap1 signaling pathway	mmu04015	2	215	0.0192652	0.0640057	14257|11461	http://www.genome.jp/kegg-bin/show_pathway?mmu04015/mmu:11461%09red/mmu:14257%09red
Regulation of actin cytoskeleton	mmu04810	2	218	0.0197665	0.0640057	17698|11461	http://www.genome.jp/kegg-bin/show_pathway?mmu04810/mmu:11461%09red/mmu:17698%09red
Epstein-Barr virus infection	mmu05169	2	232	0.0221775	0.0685487	15481|22631	http://www.genome.jp/kegg-bin/show_pathway?mmu05169/mmu:22631%09red/mmu:15481%09red
Renin-angiotensin system	mmu04614	1	36	0.0357068	0.105568	11421	http://www.genome.jp/kegg-bin/show_pathway?mmu04614/mmu:11421%09red
Glycine, serine and threonine metabolism	mmu00260	1	41	0.0404358	0.114568	18648	http://www.genome.jp/kegg-bin/show_pathway?mmu00260/mmu:18648%09red
Staphylococcus aureus infection	mmu05150	1	53	0.0516934	0.136993	317677	http://www.genome.jp/kegg-bin/show_pathway?mmu05150/mmu:317677%09red
Legionellosis	mmu05134	1	58	0.0563461	0.136993	15481	http://www.genome.jp/kegg-bin/show_pathway?mmu05134/mmu:15481%09red
Longevity regulating pathway - multiple species	mmu04213	1	64	0.0618999	0.136993	15481	http://www.genome.jp/kegg-bin/show_pathway?mmu04213/mmu:15481%09red
Central carbon metabolism in cancer	mmu05230	1	66	0.0637441	0.136993	18648	http://www.genome.jp/kegg-bin/show_pathway?mmu05230/mmu:18648%09red
p53 signaling pathway	mmu04115	1	68	0.0655847	0.136993	16009	http://www.genome.jp/kegg-bin/show_pathway?mmu04115/mmu:16009%09red
Inositol phosphate metabolism	mmu00562	1	70	0.0674219	0.136993	21991	http://www.genome.jp/kegg-bin/show_pathway?mmu00562/mmu:21991%09red
Renin secretion	mmu04924	1	72	0.0692555	0.136993	11421	http://www.genome.jp/kegg-bin/show_pathway?mmu04924/mmu:11421%09red
Gastric acid secretion	mmu04971	1	73	0.070171	0.136993	11461	http://www.genome.jp/kegg-bin/show_pathway?mmu04971/mmu:11461%09red
Pertussis	mmu05133	1	74	0.0710856	0.136993	317677	http://www.genome.jp/kegg-bin/show_pathway?mmu05133/mmu:317677%09red
Adherens junction	mmu04520	1	74	0.0710856	0.136993	11461	http://www.genome.jp/kegg-bin/show_pathway?mmu04520/mmu:11461%09red
Arrhythmogenic right ventricular cardiomyopathy (ARVC)	mmu05412	1	74	0.0710856	0.136993	11461	http://www.genome.jp/kegg-bin/show_pathway?mmu05412/mmu:11461%09red
Bacterial invasion of epithelial cells	mmu05100	1	78	0.0747353	0.136993	11461	http://www.genome.jp/kegg-bin/show_pathway?mmu05100/mmu:11461%09red
Salmonella infection	mmu05132	1	78	0.0747353	0.136993	11461	http://www.genome.jp/kegg-bin/show_pathway?mmu05132/mmu:11461%09red
Cardiac muscle contraction	mmu04260	1	80	0.076555	0.136993	11464	http://www.genome.jp/kegg-bin/show_pathway?mmu04260/mmu:11464%09red
ECM-receptor interaction	mmu04512	1	83	0.0792779	0.138228	20750	http://www.genome.jp/kegg-bin/show_pathway?mmu04512/mmu:20750%09red
Viral myocarditis	mmu05416	1	96	0.090987	0.148271	11461	http://www.genome.jp/kegg-bin/show_pathway?mmu05416/mmu:11461%09red
Antigen processing and presentation	mmu04612	1	98	0.0927755	0.148271	15481	http://www.genome.jp/kegg-bin/show_pathway?mmu04612/mmu:15481%09red
Estrogen signaling pathway	mmu04915	1	98	0.0927755	0.148271	15481	http://www.genome.jp/kegg-bin/show_pathway?mmu04915/mmu:15481%09red
Toll-like receptor signaling pathway	mmu04620	1	101	0.0954518	0.148271	20750	http://www.genome.jp/kegg-bin/show_pathway?mmu04620/mmu:20750%09red
Glucagon signaling pathway	mmu04922	1	102	0.0963422	0.148271	18648	http://www.genome.jp/kegg-bin/show_pathway?mmu04922/mmu:18648%09red
Chagas disease (American trypanosomiasis)	mmu05142	1	104	0.0981205	0.148271	11421	http://www.genome.jp/kegg-bin/show_pathway?mmu05142/mmu:11421%09red
HIF-1 signaling pathway	mmu04066	1	110	0.103435	0.149584	11674	http://www.genome.jp/kegg-bin/show_pathway?mmu04066/mmu:11674%09red
Toxoplasmosis	mmu05145	1	113	0.10608	0.149584	15481	http://www.genome.jp/kegg-bin/show_pathway?mmu05145/mmu:15481%09red
Oocyte meiosis	mmu04114	1	116	0.108719	0.149584	22631	http://www.genome.jp/kegg-bin/show_pathway?mmu04114/mmu:22631%09red
Thyroid hormone signaling pathway	mmu04919	1	117	0.109596	0.149584	11461	http://www.genome.jp/kegg-bin/show_pathway?mmu04919/mmu:11461%09red
Platelet activation	mmu04611	1	123	0.114845	0.149584	11461	http://www.genome.jp/kegg-bin/show_pathway?mmu04611/mmu:11461%09red
Lysosome	mmu04142	1	124	0.115716	0.149584	13033	http://www.genome.jp/kegg-bin/show_pathway?mmu04142/mmu:13033%09red
Cell cycle	mmu04110	1	125	0.116587	0.149584	22631	http://www.genome.jp/kegg-bin/show_pathway?mmu04110/mmu:22631%09red
Sphingolipid signaling pathway	mmu04071	1	125	0.116587	0.149584	13033	http://www.genome.jp/kegg-bin/show_pathway?mmu04071/mmu:13033%09red
Spliceosome	mmu03040	1	135	0.125251	0.157724	15481	http://www.genome.jp/kegg-bin/show_pathway?mmu03040/mmu:15481%09red
Tight junction	mmu04530	1	141	0.13041	0.161234	11461	http://www.genome.jp/kegg-bin/show_pathway?mmu04530/mmu:11461%09red
Hepatitis B	mmu05161	1	146	0.134686	0.163547	22631	http://www.genome.jp/kegg-bin/show_pathway?mmu05161/mmu:22631%09red
Systemic lupus erythematosus	mmu05322	1	149	0.137242	0.163727	317677	http://www.genome.jp/kegg-bin/show_pathway?mmu05322/mmu:317677%09red
Adrenergic signaling in cardiomyocytes	mmu04261	1	152	0.13979	0.163892	11464	http://www.genome.jp/kegg-bin/show_pathway?mmu04261/mmu:11464%09red
Oxytocin signaling pathway	mmu04921	1	158	0.144865	0.166963	11461	http://www.genome.jp/kegg-bin/show_pathway?mmu04921/mmu:11461%09red
Protein processing in endoplasmic reticulum	mmu04141	1	167	0.152423	0.172746	15481	http://www.genome.jp/kegg-bin/show_pathway?mmu04141/mmu:15481%09red
Cell adhesion molecules (CAMs)	mmu04514	1	176	0.159916	0.17618	20343	http://www.genome.jp/kegg-bin/show_pathway?mmu04514/mmu:20343%09red
Tuberculosis	mmu05152	1	179	0.162399	0.17618	13033	http://www.genome.jp/kegg-bin/show_pathway?mmu05152/mmu:13033%09red
Transcriptional misregulation in cancer	mmu05202	1	180	0.163226	0.17618	16009	http://www.genome.jp/kegg-bin/show_pathway?mmu05202/mmu:16009%09red
Phagosome	mmu04145	1	192	0.173078	0.183895	11461	http://www.genome.jp/kegg-bin/show_pathway?mmu04145/mmu:11461%09red
Ras signaling pathway	mmu04014	1	231	0.204324	0.213754	14257	http://www.genome.jp/kegg-bin/show_pathway?mmu04014/mmu:14257%09red
Viral carcinogenesis	mmu05203	1	245	0.215258	0.221781	22631	http://www.genome.jp/kegg-bin/show_pathway?mmu05203/mmu:22631%09red
MAPK signaling pathway	mmu04010	1	254	0.222209	0.225526	15481	http://www.genome.jp/kegg-bin/show_pathway?mmu04010/mmu:15481%09red
Endocytosis	mmu04144	1	294	0.252386	0.252386	15481	http://www.genome.jp/kegg-bin/show_pathway?mmu04144/mmu:15481%09red

## Sheet: 24h
Term	ID	Input number	Background number	P-Value	Corrected P-Value	Input	Hyperlink
Proteasome	mmu03050	4	45	6.95788e-08	1.94821e-06	26442|19167|19170|26440	http://www.genome.jp/kegg-bin/show_pathway?mmu03050/mmu:19170%09red/mmu:26440%09red/mmu:26442%09red/mmu:19167%09red
Complement and coagulation cascades	mmu04610	4	87	8.57348e-07	1.20029e-05	17195|56373|14071|12258	http://www.genome.jp/kegg-bin/show_pathway?mmu04610/mmu:14071%09red/mmu:12258%09red/mmu:17195%09red/mmu:56373%09red
ECM-receptor interaction	mmu04512	3	83	4.55309e-05	0.000402598	12842|12843|20750	http://www.genome.jp/kegg-bin/show_pathway?mmu04512/mmu:12843%09red/mmu:12842%09red/mmu:20750%09red
Protein digestion and absorption	mmu04974	3	90	5.7514e-05	0.000402598	12842|12843|56373	http://www.genome.jp/kegg-bin/show_pathway?mmu04974/mmu:12843%09red/mmu:12842%09red/mmu:56373%09red
Focal adhesion	mmu04510	3	203	0.000598598	0.00335215	12842|12843|20750	http://www.genome.jp/kegg-bin/show_pathway?mmu04510/mmu:12843%09red/mmu:12842%09red/mmu:20750%09red
Biosynthesis of amino acids	mmu01230	2	79	0.0019343	0.00902672	21881|18648	http://www.genome.jp/kegg-bin/show_pathway?mmu01230/mmu:21881%09red/mmu:18648%09red
PI3K-Akt signaling pathway	mmu04151	3	350	0.00279905	0.0111962	12842|12843|20750	http://www.genome.jp/kegg-bin/show_pathway?mmu04151/mmu:12843%09red/mmu:12842%09red/mmu:20750%09red
AGE-RAGE signaling pathway in diabetic complications	mmu04933	2	103	0.00322094	0.0112733	12842|12843	http://www.genome.jp/kegg-bin/show_pathway?mmu04933/mmu:12843%09red/mmu:12842%09red
Amoebiasis	mmu05146	2	111	0.00371816	0.0115223	12842|12843	http://www.genome.jp/kegg-bin/show_pathway?mmu05146/mmu:12843%09red/mmu:12842%09red
Carbon metabolism	mmu01200	2	118	0.00418069	0.0115223	21881|18648	http://www.genome.jp/kegg-bin/show_pathway?mmu01200/mmu:21881%09red/mmu:18648%09red
Platelet activation	mmu04611	2	123	0.0045266	0.0115223	12842|12843	http://www.genome.jp/kegg-bin/show_pathway?mmu04611/mmu:12843%09red/mmu:12842%09red
Proteoglycans in cancer	mmu05205	2	208	0.0122883	0.0286728	12842|12843	http://www.genome.jp/kegg-bin/show_pathway?mmu05205/mmu:12843%09red/mmu:12842%09red
Pentose phosphate pathway	mmu00030	1	31	0.025328	0.0545526	21881	http://www.genome.jp/kegg-bin/show_pathway?mmu00030/mmu:21881%09red
Glycine, serine and threonine metabolism	mmu00260	1	41	0.0331149	0.064725	18648	http://www.genome.jp/kegg-bin/show_pathway?mmu00260/mmu:18648%09red
Ether lipid metabolism	mmu00565	1	44	0.0354392	0.064725	27226	http://www.genome.jp/kegg-bin/show_pathway?mmu00565/mmu:27226%09red
Mineral absorption	mmu04978	1	46	0.0369857	0.064725	22041	http://www.genome.jp/kegg-bin/show_pathway?mmu04978/mmu:22041%09red
Staphylococcus aureus infection	mmu05150	1	53	0.0423797	0.0698019	17195	http://www.genome.jp/kegg-bin/show_pathway?mmu05150/mmu:17195%09red
Glycolysis / Gluconeogenesis	mmu00010	1	66	0.0523196	0.0771026	18648	http://www.genome.jp/kegg-bin/show_pathway?mmu00010/mmu:18648%09red
Central carbon metabolism in cancer	mmu05230	1	66	0.0523196	0.0771026	18648	http://www.genome.jp/kegg-bin/show_pathway?mmu05230/mmu:18648%09red
Pertussis	mmu05133	1	74	0.0583868	0.0817415	12258	http://www.genome.jp/kegg-bin/show_pathway?mmu05133/mmu:12258%09red
Toll-like receptor signaling pathway	mmu04620	1	101	0.0785872	0.0954543	20750	http://www.genome.jp/kegg-bin/show_pathway?mmu04620/mmu:20750%09red
Glucagon signaling pathway	mmu04922	1	102	0.0793273	0.0954543	18648	http://www.genome.jp/kegg-bin/show_pathway?mmu04922/mmu:18648%09red
Pancreatic secretion	mmu04972	1	103	0.0800668	0.0954543	56373	http://www.genome.jp/kegg-bin/show_pathway?mmu04972/mmu:56373%09red
Metabolic pathways	mmu01100	3	1298	0.0849608	0.0954543	27226|21881|18648	http://www.genome.jp/kegg-bin/show_pathway?mmu01100/mmu:21881%09red/mmu:27226%09red/mmu:18648%09red
HIF-1 signaling pathway	mmu04066	1	110	0.085227	0.0954543	22041	http://www.genome.jp/kegg-bin/show_pathway?mmu04066/mmu:22041%09red
Phagosome	mmu04145	1	192	0.143628	0.153229	17195	http://www.genome.jp/kegg-bin/show_pathway?mmu04145/mmu:17195%09red
Chemokine signaling pathway	mmu04062	1	198	0.147757	0.153229	56744	http://www.genome.jp/kegg-bin/show_pathway?mmu04062/mmu:56744%09red
Cytokine-cytokine receptor interaction	mmu04060	1	265	0.19257	0.19257	56744	http://www.genome.jp/kegg-bin/show_pathway?mmu04060/mmu:56744%09red

## Sheet: 72h
Term	ID	Input number	Background number	P-Value	Corrected P-Value	Input	Hyperlink
AGE-RAGE signaling pathway in diabetic complications	mmu04933	4	103	5.62804e-07	2.19494e-05	12842|12843|17390|22329	http://www.genome.jp/kegg-bin/show_pathway?mmu04933/mmu:12843%09red/mmu:12842%09red/mmu:22329%09red/mmu:17390%09red
ECM-receptor interaction	mmu04512	3	83	2.07446e-05	0.000404519	12842|12843|21923	http://www.genome.jp/kegg-bin/show_pathway?mmu04512/mmu:12843%09red/mmu:12842%09red/mmu:21923%09red
Leukocyte transendothelial migration	mmu04670	3	121	6.18983e-05	0.000632916	22329|12562|17390	http://www.genome.jp/kegg-bin/show_pathway?mmu04670/mmu:17390%09red/mmu:22329%09red/mmu:12562%09red
Platelet activation	mmu04611	3	123	6.49144e-05	0.000632916	12842|12843|110135	http://www.genome.jp/kegg-bin/show_pathway?mmu04611/mmu:12843%09red/mmu:12842%09red/mmu:110135%09red
Cell adhesion molecules (CAMs)	mmu04514	3	176	0.000183452	0.00143093	12562|20343|22329	http://www.genome.jp/kegg-bin/show_pathway?mmu04514/mmu:22329%09red/mmu:12562%09red/mmu:20343%09red
Focal adhesion	mmu04510	3	203	0.000277178	0.00165668	12842|12843|21923	http://www.genome.jp/kegg-bin/show_pathway?mmu04510/mmu:12843%09red/mmu:12842%09red/mmu:21923%09red
Proteoglycans in cancer	mmu05205	3	208	0.000297353	0.00165668	12842|12843|17390	http://www.genome.jp/kegg-bin/show_pathway?mmu05205/mmu:12843%09red/mmu:12842%09red/mmu:17390%09red
PI3K-Akt signaling pathway	mmu04151	3	350	0.00132187	0.00528905	12842|12843|21923	http://www.genome.jp/kegg-bin/show_pathway?mmu04151/mmu:12843%09red/mmu:12842%09red/mmu:21923%09red
Hematopoietic cell lineage	mmu04640	2	87	0.00139715	0.00528905	16790|22042	http://www.genome.jp/kegg-bin/show_pathway?mmu04640/mmu:16790%09red/mmu:22042%09red
Complement and coagulation cascades	mmu04610	2	87	0.00139715	0.00528905	17195|110135	http://www.genome.jp/kegg-bin/show_pathway?mmu04610/mmu:17195%09red/mmu:110135%09red
Protein digestion and absorption	mmu04974	2	90	0.00149178	0.00528905	12842|12843	http://www.genome.jp/kegg-bin/show_pathway?mmu04974/mmu:12843%09red/mmu:12842%09red
Amoebiasis	mmu05146	2	111	0.0022373	0.00727124	12842|12843	http://www.genome.jp/kegg-bin/show_pathway?mmu05146/mmu:12843%09red/mmu:12842%09red
Protein processing in endoplasmic reticulum	mmu04141	2	167	0.00491405	0.0147422	14828|17155	http://www.genome.jp/kegg-bin/show_pathway?mmu04141/mmu:14828%09red/mmu:17155%09red
Phagosome	mmu04145	2	192	0.00641959	0.0178832	17195|22042	http://www.genome.jp/kegg-bin/show_pathway?mmu04145/mmu:17195%09red/mmu:22042%09red
Protein export	mmu03060	1	31	0.0196672	0.0505122	14828	http://www.genome.jp/kegg-bin/show_pathway?mmu03060/mmu:14828%09red
Prion diseases	mmu05020	1	34	0.0214919	0.0505122	14828	http://www.genome.jp/kegg-bin/show_pathway?mmu05020/mmu:14828%09red
Renin-angiotensin system	mmu04614	1	36	0.0227065	0.0505122	16790	http://www.genome.jp/kegg-bin/show_pathway?mmu04614/mmu:16790%09red
African trypanosomiasis	mmu05143	1	37	0.0233133	0.0505122	22329	http://www.genome.jp/kegg-bin/show_pathway?mmu05143/mmu:22329%09red
Bladder cancer	mmu05219	1	41	0.0257368	0.0528282	17390	http://www.genome.jp/kegg-bin/show_pathway?mmu05219/mmu:17390%09red
N-Glycan biosynthesis	mmu00510	1	49	0.0305666	0.0559104	17155	http://www.genome.jp/kegg-bin/show_pathway?mmu00510/mmu:17155%09red
Malaria	mmu05144	1	50	0.0311687	0.0559104	22329	http://www.genome.jp/kegg-bin/show_pathway?mmu05144/mmu:22329%09red
Drug metabolism - other enzymes	mmu00983	1	51	0.0317704	0.0559104	102022	http://www.genome.jp/kegg-bin/show_pathway?mmu00983/mmu:102022%09red
Staphylococcus aureus infection	mmu05150	1	53	0.0329728	0.0559104	17195	http://www.genome.jp/kegg-bin/show_pathway?mmu05150/mmu:17195%09red
Glutathione metabolism	mmu00480	1	57	0.0353733	0.0574817	16790	http://www.genome.jp/kegg-bin/show_pathway?mmu00480/mmu:16790%09red
Thyroid hormone synthesis	mmu04918	1	71	0.0437303	0.0682193	14828	http://www.genome.jp/kegg-bin/show_pathway?mmu04918/mmu:14828%09red
GnRH signaling pathway	mmu04912	1	88	0.0537848	0.0802214	17390	http://www.genome.jp/kegg-bin/show_pathway?mmu04912/mmu:17390%09red
Endocrine resistance	mmu01522	1	95	0.0578954	0.0802214	17390	http://www.genome.jp/kegg-bin/show_pathway?mmu01522/mmu:17390%09red
Antigen processing and presentation	mmu04612	1	98	0.0596518	0.0802214	14828	http://www.genome.jp/kegg-bin/show_pathway?mmu04612/mmu:14828%09red
Estrogen signaling pathway	mmu04915	1	98	0.0596518	0.0802214	17390	http://www.genome.jp/kegg-bin/show_pathway?mmu04915/mmu:17390%09red
NF-kappa B signaling pathway	mmu04064	1	104	0.0631552	0.0821018	22329	http://www.genome.jp/kegg-bin/show_pathway?mmu04064/mmu:22329%09red
HIF-1 signaling pathway	mmu04066	1	110	0.0666462	0.0826398	22042	http://www.genome.jp/kegg-bin/show_pathway?mmu04066/mmu:22042%09red
TNF signaling pathway	mmu04668	1	112	0.0678071	0.0826398	22329	http://www.genome.jp/kegg-bin/show_pathway?mmu04668/mmu:22329%09red
Lysosome	mmu04142	1	124	0.0747433	0.088333	64138	http://www.genome.jp/kegg-bin/show_pathway?mmu04142/mmu:64138%09red
Apoptosis	mmu04210	1	139	0.083344	0.0956005	64138	http://www.genome.jp/kegg-bin/show_pathway?mmu04210/mmu:64138%09red
MicroRNAs in cancer	mmu05206	1	281	0.161057	0.177469	21923	http://www.genome.jp/kegg-bin/show_pathway?mmu05206/mmu:21923%09red
Endocytosis	mmu04144	1	294	0.167847	0.177469	22042	http://www.genome.jp/kegg-bin/show_pathway?mmu04144/mmu:22042%09red
HTLV-I infection	mmu05166	1	295	0.168368	0.177469	22329	http://www.genome.jp/kegg-bin/show_pathway?mmu05166/mmu:22329%09red
Metabolic pathways	mmu01100	2	1298	0.192228	0.197286	17155|16790	http://www.genome.jp/kegg-bin/show_pathway?mmu01100/mmu:16790%09red/mmu:17155%09red
Pathways in cancer	mmu05200	1	398	0.220305	0.220305	17390	http://www.genome.jp/kegg-bin/show_pathway?mmu05200/mmu:17390%09red
Supplementary Table 4
